# Supplementary material for: Energetics of water in the Solar System
Source: Research Square preprint supplement (doi:10.21203/rs.3.rs-820353/v1), 2021-09-02
Supplement: Supplementary file 1 [file eabe361f7ab73ef846aaf115.xlsx]

## Sheet: Ice
H2O ICE
	Instance	Ice Temperature	Heat Addition	Separation	Gravitational	Total	St.Dev
Mercury	A	122.1	126.125	0	0	126.125
	B	153.6	80.622	0	0	80.622
	C	90.6	186.979	0	0	186.979
	Average		131.242	0	0	131.242	53.3626
Earth	A	221.2	21.1008	0	0	21.1008
	B	266.2	3.67184	0	0	3.67184
	C	187.4	45.1867	0	0	45.1867
	Average		23.3198	0	0	23.3198	20.8462
Moon	A	95.05	177.278	0	0	177.278
	B	82.665	205.224	0	0	205.224
	C	108.6	150.074	0	0	150.074
	Average		177.525	0	0	177.525	27.5756
Mars	A	193.05	40.4262	0	0	40.4262
	B	214.4	25.1284	0	0	25.1284
	C	237	13.2141	0	0	13.2141
	Average		26.2563	0	0	26.2563	13.6411
Europa	A	116.45	135.79	0	0	135.79
	B	118.7	131.881	0	0	131.881
	C	120.95	128.052	0	0	128.052
	Average		131.908	0	0	131.908	3.86901
Ganymede	A	137.8	101.766	0	0	101.766
	B	131.1	111.73	0	0	111.73
	C	135.6	104.969	0	0	104.969
	Average		108.349	0	0	108.349	5.08657
Enceladus	A	65.77	249.299	0	0	249.299
	B	95.05	177.278	0	0	177.278
	C	124.3	122.495	0	0	122.495
	Average		183.024	0	0	183.024	63.5969
Tethys	A	75.905	222.034	0	0	222.034
	B	83.79	202.625	0	0	202.625
	C	68.02	243.01	0	0	243.01
	Average		222.556	0	0	222.556	20.1977
Uranus	A	101.8	163.304	0	1774	1937.3
	B	161.5	71.2047	0	2217.5	2288.7
	C	246	9.60017	0	2661	2670.6
	Average		81.3696	0	2217.5	2298.87	366.754
Jupiter	A	234	14.5579	0	991.6	1006.16
	B	237	13.2141	0	1487.4	1500.61
	C	248.2	8.81013	0	1983.2	1992.01
	Average		12.1941	0	1487.4	1499.59	492.927

## Sheet: Brine
H2O Brine
	Instance	Temeperature (C )	Heat Input	Separation	Pumping	Total	St.Dev
Earth		25	0.645033	2.77	0	3.41503		Assumes surface water
		-1.8	0.71923	2.32	0	3.03923
		35	3.97829	2.61	0	6.58829
	Average		1.78085	2.56667	0	4.34752	1.94964
Mars		0	0	29.69	2.78325	32.4733		Assumes brine reservoir depth is ~750m
		-5	2.22101	57.75	2.78325	62.7543
		-10	5.13935	24.12	2.78325	32.0426
		0	0	14.83	2.78325	17.6133
		0	0	9.65	2.78325	12.4333
		0	0	28.37	2.78325	31.1532
	Average		1.22673	27.4017	2.78325	31.4116	17.5187
Europa		-4.8	2.11878	4.927	26.3	33.3458		Assumes ice thickness is ~20km thick
		2	0.693149	9.819	26.3	36.8121
		71	43.7179	43.248	26.3	113.266
	Average		15.5099	19.3313	26.3	61.1413	45.1745
Ganymede		-23	15.9906	1.51141	1142.4	1159.9		Ice thickness ~800km thick
		-13	7.22507	1.6238	1142.4	1151.25
		7	1.93789	1.95485	1142.4	1146.29
	Average		8.3845	1.69669	1142.4	1152.48	6.88779
Enceladus		0	0	0.528014	3.955	4.48301		Ice thickness ~35km thick
		0	0	2.90384	3.955	6.85884
		25	0.645033	0.572921	3.955	5.17295
		25	0.645033	3.43332
	Average		0.215011	1.33493	3.955	5.50494	1.22221
*Temperature in this case is not independent of composition. Values are noted to denote the equlibrium temperature of the solution use in the respective test case.

## Sheet: Vapor
H2O Vapor
	Instance	Air Temperature	Pressure (kpa)	Vapor Pressure (RH for Earth)	Heat Input	Separation	Gravitational	Total	StDev
Venus	A	740	9500	0.418	3437.66	165.021	443.5	4046.18
	B	536	500	0.022	1047.42	720.073	70.96	1838.45
	C	428	150	0.0066	345.716	853.676	44.35	1243.74
	Average				1610.26	579.59	186.27	2376.12	1476.56
Earth	A	273.8		0.4168	17.1121	104.075	0	2618
(uses RH)	B	333		0.1927	25.7144	221.371	0	2613
	C	306.265		0.8214	0.96136	28.3142	0	2453
	Average				14.596	117.92	0	132.516	93.8527
Mars	A	256	0.57	5.928e-05	51.5177	1033.94	0	1085.46
	B	276	0.47	0.00019893	14.2646	975.746	0	990.011
	C	337	0.71	0.00015333	31.7211	1221.77	0	1253.49
	Average				32.5011	1077.15	0	1109.65	133.397
